# Supplementary material
Source: PubMed Central journal article supplement (PMC4266718)
Supplement: ajcr0004-0862-f5.pdf [file ajcr0004-0862-f5.pdf]

## SUPPLEMENTARY DATA

A mathematical model for short-term vs. long-term survival in patients with  
glioma

Jason B. Nikas<sup>1\*</sup>

<sup>1</sup>Genomix, Inc., Minneapolis, MN 55364, USA

\*Correspondence: Dr. Jason B. Nikas at: [jbnikas@genomix-inc.com](mailto:jbnikas@genomix-inc.com)

Figure S1 and Tables S1-S7

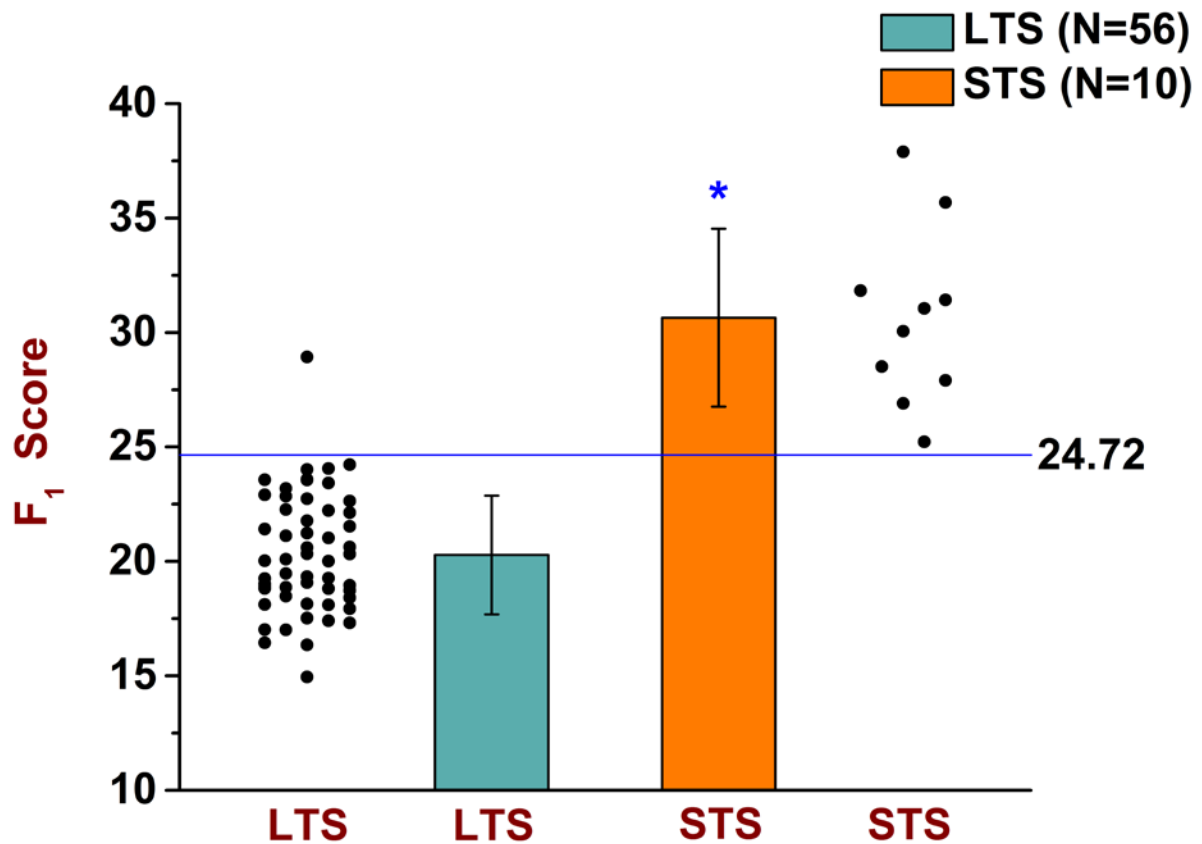

**Figure S1.** Results of the  $F_1$  function in the development phase.

Sixty six subjects (56 LTS and 10 STS) were randomly selected from the total number of subjects (75 LTS and 14 STS) for the development phase. The  $F_1$  uses 5 of the 29 most significant genes (listed in Table 1) as its input variables. Using the expression value of those 5 genes for a particular subject, the  $F_1$  yields the  $F_1$  score of that subject; and, based on the determined cut-off score for this phase (24.72), the  $F_1$  classifies that subject as a long-term survivor (LTS) if the  $F_1$  score is  $< 24.72$  or as a short-term survivor (STS) if the  $F_1$  score is  $\geq 24.72$ . As can be seen here in this dot plot & bar graph, all 10 STS subjects (orange color) had  $F_1$  scores greater than the cut-off score of 24.72 and were therefore identified correctly by the  $F_1$  [sensitivity =  $(10/10) = 1.000$ ]. Regarding the LTS subjects (green color), all but one of them had  $F_1$  scores lower than the cut-off score of 24.72 and were therefore identified correctly by the  $F_1$  [specificity =  $(55/56) = 0.982$ ]. The mean  $F_1$  score of the LTS subjects was 20.281 (top of the green bar) and their standard deviation (whiskers above or below the top of the green bar) was 2.596. The mean  $F_1$  score of the STS subjects was 30.649 (top of the orange bar) and their standard deviation (whiskers above or below the top of the orange bar) was 3.887. The significance level was set at  $\alpha = 0.001$  (two-tailed), and the probability of significance for the  $F_1$  was  $P = 6.00 \times 10^{-16}$  (independent t-Test with T-value = -10.735). The  $F_1$  is parametrically distributed with respect to both groups. The  $F_1$  scores of all 66 subjects used in the development phase are shown in Table S3.

**Table S1.** Subject clinical & demographical information

| Subject ID   | Subject No | Gender | Age (yrs) | Tumor Type        | Grade | Survival (yrs) |
|--------------|------------|--------|-----------|-------------------|-------|----------------|
| TCGA-CS-4938 | 1          | F      | 31        | Astrocytoma       | G2    | > 6            |
| TCGA-CS-4942 | 2          | F      | 44        | Astrocytoma       | G3    | 3.658          |
| TCGA-CS-5390 | 3          | F      | 47        | Oligodendroglioma | G2    | > 5            |
| TCGA-CS-5394 | 4          | M      | 40        | Astrocytoma       | G3    | > 5            |
| TCGA-DB-5270 | 5          | F      | 38        | Oligoastrocytoma  | G3    | > 8            |
| TCGA-DB-5273 | 6          | M      | 33        | Astrocytoma       | G3    | > 4            |
| TCGA-DB-5274 | 7          | F      | 37        | Oligoastrocytoma  | G3    | > 4            |
| TCGA-DB-5275 | 8          | M      | 36        | Oligoastrocytoma  | G3    | > 4            |
| TCGA-DB-5276 | 9          | M      | 32        | Oligoastrocytoma  | G3    | > 3            |
| TCGA-DB-5277 | 10         | M      | 34        | Astrocytoma       | G3    | > 3            |
| TCGA-DB-5278 | 11         | M      | 17        | Oligodendroglioma | G2    | > 3            |
| TCGA-DB-5279 | 12         | M      | 59        | Oligodendroglioma | G2    | > 3            |
| TCGA-DB-5280 | 13         | M      | 43        | Oligoastrocytoma  | G2    | > 3            |
| TCGA-DB-5281 | 14         | M      | 61        | Oligoastrocytoma  | G3    | > 4            |
| TCGA-DB-A4XG | 15         | M      | 34        | Oligodendroglioma | G3    | > 6            |
| TCGA-DH-5141 | 16         | M      | 32        | Oligodendroglioma | G3    | > 4            |
| TCGA-DU-5870 | 17         | F      | 34        | Oligodendroglioma | G2    | > 15           |
| TCGA-DU-6392 | 18         | F      | 35        | Astrocytoma       | G3    | > 17           |
| TCGA-DU-6393 | 19         | M      | 66        | Oligodendroglioma | G3    | 4.342          |
| TCGA-DU-6395 | 20         | M      | 31        | Oligoastrocytoma  | G2    | 4.085          |
| TCGA-DU-6396 | 21         | F      | 31        | Oligoastrocytoma  | G3    | 6.263          |
| TCGA-DU-6397 | 22         | M      | 45        | Oligodendroglioma | G3    | 3.838          |
| TCGA-DU-6399 | 23         | M      | 54        | Oligodendroglioma | G2    | 5.477          |
| TCGA-DU-6401 | 24         | F      | 31        | Oligodendroglioma | G2    | 7.288          |
| TCGA-DU-6404 | 25         | F      | 24        | Oligodendroglioma | G3    | 11.145         |
| TCGA-DU-6407 | 26         | F      | 35        | Oligodendroglioma | G2    | 7.877          |
| TCGA-DU-6408 | 27         | F      | 23        | Oligodendroglioma | G3    | 9.504          |
| TCGA-DU-7007 | 28         | M      | 33        | Astrocytoma       | G2    | 5.247          |
| TCGA-DU-7008 | 29         | F      | 41        | Oligodendroglioma | G2    | > 12           |
| TCGA-DU-7009 | 30         | F      | 32        | Oligodendroglioma | G2    | > 10           |
| TCGA-DU-7011 | 31         | M      | 25        | Oligoastrocytoma  | G2    | 8.767          |
| TCGA-DU-7014 | 32         | M      | 59        | Oligodendroglioma | G2    | 9.784          |
| TCGA-DU-7015 | 33         | F      | 41        | Oligodendroglioma | G2    | > 6            |
| TCGA-DU-7294 | 34         | F      | 53        | Oligodendroglioma | G2    | > 7            |
| TCGA-DU-7299 | 35         | M      | 33        | Astrocytoma       | G3    | 3.666          |
| TCGA-DU-7302 | 36         | F      | 48        | Oligodendroglioma | G3    | > 4            |
| TCGA-E1-5302 | 37         | M      | 41        | Astrocytoma       | G3    | 4.178          |

|              |    |   |    |                   |    |        |
|--------------|----|---|----|-------------------|----|--------|
| TCGA-E1-5303 | 38 | M | 38 | Astrocytoma       | G3 | 5.619  |
| TCGA-E1-5304 | 39 | M | 42 | Astrocytoma       | G3 | 3.427  |
| TCGA-E1-5305 | 40 | M | 34 | Astrocytoma       | G3 | 6.663  |
| TCGA-E1-5307 | 41 | F | 62 | Astrocytoma       | G3 | 4.827  |
| TCGA-E1-5311 | 42 | M | 31 | Oligodendroglioma | G3 | 11.189 |
| TCGA-E1-5318 | 43 | F | 42 | Oligodendroglioma | G2 | 6.515  |
| TCGA-E1-5319 | 44 | F | 48 | Oligodendroglioma | G2 | 7.964  |
| TCGA-E1-5322 | 45 | F | 38 | Oligoastrocytoma  | G2 | 10.899 |
| TCGA-HT-7480 | 46 | M | 33 | Oligodendroglioma | G2 | > 6    |
| TCGA-HT-7481 | 47 | M | 39 | Oligodendroglioma | G2 | > 5    |
| TCGA-HT-7482 | 48 | F | 18 | Oligoastrocytoma  | G2 | > 6    |
| TCGA-HT-7483 | 49 | M | 14 | Oligoastrocytoma  | G2 | > 13   |
| TCGA-HT-7485 | 50 | M | 42 | Astrocytoma       | G2 | > 5    |
| TCGA-HT-7601 | 51 | F | 30 | Astrocytoma       | G3 | > 3    |
| TCGA-HT-7602 | 52 | M | 21 | Oligodendroglioma | G2 | > 3    |
| TCGA-HT-7603 | 53 | M | 29 | Oligodendroglioma | G2 | > 3    |
| TCGA-HT-7604 | 54 | M | 50 | Astrocytoma       | G2 | > 8    |
| TCGA-HT-7605 | 55 | M | 38 | Oligodendroglioma | G2 | > 3    |
| TCGA-HT-7606 | 56 | F | 30 | Astrocytoma       | G2 | > 3    |
| TCGA-HT-7608 | 57 | M | 61 | Oligoastrocytoma  | G2 | > 4    |
| TCGA-HT-7609 | 58 | M | 34 | Oligoastrocytoma  | G3 | > 4    |
| TCGA-HT-7610 | 59 | F | 25 | Oligoastrocytoma  | G2 | > 4    |
| TCGA-HT-7620 | 60 | M | 40 | Oligodendroglioma | G3 | > 4    |
| TCGA-HT-7676 | 61 | M | 26 | Oligodendroglioma | G2 | > 3    |
| TCGA-HT-7681 | 62 | F | 29 | Oligoastrocytoma  | G2 | > 3    |
| TCGA-HT-7684 | 63 | M | 58 | Oligoastrocytoma  | G3 | > 3    |
| TCGA-HT-7686 | 64 | F | 29 | Astrocytoma       | G3 | > 3    |
| TCGA-HT-7691 | 65 | F | 31 | Astrocytoma       | G2 | > 3    |
| TCGA-HT-7693 | 66 | F | 51 | Oligodendroglioma | G2 | > 3    |
| TCGA-HT-7694 | 67 | M | 60 | Oligodendroglioma | G3 | > 3    |
| TCGA-HT-7855 | 68 | M | 39 | Astrocytoma       | G3 | > 3    |
| TCGA-HT-7856 | 69 | M | 35 | Oligodendroglioma | G3 | > 3    |
| TCGA-HT-7857 | 70 | F | 24 | Astrocytoma       | G3 | > 5    |
| TCGA-HT-7858 | 71 | M | 28 | Astrocytoma       | G2 | > 4    |
| TCGA-HT-7874 | 72 | F | 41 | Oligodendroglioma | G3 | > 3    |
| TCGA-HT-7875 | 73 | M | 56 | Oligodendroglioma | G2 | > 3    |
| TCGA-HT-8013 | 74 | F | 37 | Oligoastrocytoma  | G2 | 5.296  |
| TCGA-HT-8113 | 75 | F | 49 | Oligodendroglioma | G2 | > 5    |
| TCGA-CS-4941 | 76 | M | 67 | Astrocytoma       | G3 | 0.641  |
| TCGA-CS-5397 | 77 | F | 54 | Astrocytoma       | G3 | 0.532  |
| TCGA-DU-5852 | 78 | F | 61 | Oligoastrocytoma  | G3 | 0.562  |
| TCGA-DU-6400 | 79 | F | 66 | Oligodendroglioma | G2 | 0.101  |
| TCGA-DU-6402 | 80 | M | 52 | Astrocytoma       | G3 | 0.584  |

|              |    |   |    |                   |    |       |
|--------------|----|---|----|-------------------|----|-------|
| TCGA-DU-6403 | 81 | F | 60 | Oligoastrocytoma  | G3 | 0.970 |
| TCGA-DU-7006 | 82 | F | 60 | Astrocytoma       | G3 | 0.956 |
| TCGA-DU-7012 | 83 | F | 74 | Astrocytoma       | G3 | 0.542 |
| TCGA-DU-7013 | 84 | M | 59 | Astrocytoma       | G3 | 0.737 |
| TCGA-DU-7290 | 85 | F | 45 | Astrocytoma       | G3 | 0.863 |
| TCGA-DU-7292 | 86 | M | 69 | Astrocytoma       | G3 | 0.663 |
| TCGA-DU-8158 | 87 | F | 57 | Astrocytoma       | G3 | 0.425 |
| TCGA-HT-7607 | 88 | F | 61 | Astrocytoma       | G2 | 0.263 |
| TCGA-HT-7616 | 89 | M | 75 | Oligodendroglioma | G3 | 0.019 |

Clinical and demographical information about all 89 subjects used in this study. “G2” denotes grade II glioma, whereas “G3” denotes grade III glioma. Both age and survival are expressed in years.

**Table S2. Control genes**

| Gene ID | DE (STS) | ROC AUC | FC     | P      | M <sub>L</sub> | SD <sub>L</sub> | M <sub>S</sub> | SD <sub>S</sub> | Notes |
|---------|----------|---------|--------|--------|----------------|-----------------|----------------|-----------------|-------|
| TBP     | ↓        | -0.6400 | -1.134 | 0.0991 | 305.345        | 55.917          | 269.260        | 69.251          | MW    |
| GAPDH   | ↓        | -0.5124 | -1.014 | 0.8892 | 55077.998      | 27507.540       | 54340.327      | 22340.622       | MW    |
| HPRT1   | ↑        | 0.6495  | 1.196  | 0.0777 | 337.655        | 341.162         | 403.868        | 278.501         | MW    |
| ALAS1   | ↑        | 0.7924  | 1.233  | 0.0005 | 934.375        | 210.949         | 1151.754       | 181.340         | TT    |
| TUBA1B  | ↑        | 0.6600  | 1.247  | 0.0585 | 20329.351      | 8211.046        | 25357.806      | 9497.810        | MW    |
| ALB     | ↓        | -0.6333 | -1.217 | 0.1167 | 10.406         | 7.375           | 8.552          | 9.014           | MW    |
| B2M     | ↑        | 0.7171  | 1.486  | 0.0093 | 20661.472      | 12414.934       | 30713.233      | 15691.137       | MW    |
| G6PD    | ↑        | 0.7810  | 1.347  | 0.0006 | 688.970        | 163.633         | 927.703        | 327.069         | MW    |
| POLR2A  | ↑        | 0.5029  | 1.019  | 0.9778 | 5400.021       | 1399.469        | 5502.813       | 1525.207        | MW    |
| PPIA    | ↑        | 0.5276  | 1.025  | 0.7507 | 3407.330       | 804.451         | 3492.089       | 1022.502        | MW    |
| SDHA    | ↓        | -0.6714 | -1.163 | 0.0457 | 2626.016       | 637.189         | 2258.161       | 537.103         | TT    |
| UBC     | ↑        | 0.6257  | 1.213  | 0.1396 | 32311.188      | 10082.128       | 39181.196      | 18045.906       | MW    |
| YWHAZ   | ↑        | 0.6010  | 1.112  | 0.2373 | 10450.292      | 3098.215        | 11622.114      | 3590.663        | MW    |
| LRP1    | ↑        | 0.6524  | 1.327  | 0.0720 | 20336.358      | 7489.631        | 26976.757      | 12183.433       | MW    |
| PGK1    | ↑        | 0.5733  | 1.022  | 0.3927 | 5651.227       | 1931.224        | 5776.726       | 1357.817        | MW    |
| HMBS    | ↓        | -0.6314 | -1.133 | 0.1221 | 413.441        | 140.314         | 365.045        | 110.946         | MW    |
| DIMT1L  | ↓        | -0.7352 | -1.277 | 0.0046 | 563.914        | 184.869         | 441.500        | 81.754          | MW    |
| LMNB1   | ↑        | 0.6886  | 1.707  | 0.0249 | 477.157        | 383.555         | 814.470        | 696.903         | MW    |

All of those 18 control genes were analyzed for statistically significant differential expression between the two groups (14 STS and 75 LTS subjects). The arrows indicate differential expression [over-expression (↑) or under-expression (↓)] of the STS subjects as compared with the LTS subjects. The ROC AUC value, the fold change (FC) value, the P-value, the mean expression value of the LTS subjects (M<sub>L</sub>) and their standard deviation (SD<sub>L</sub>), the mean expression value of the STS subjects (M<sub>S</sub>) and their standard deviation (SD<sub>S</sub>) are listed for each gene variable.

(AW): The Aspin-Welch unequal-variance test was used for the calculation of the P-value for those variables.

(MW): The Mann-Whitney U test was used for the calculation of the P-value for those variables.

(TT): The independent t-Test for parametric variables was used for the calculation of the P-value for those variables.

As can be seen, none of the 18 control genes met the overall criterion of significance set for, and required by, this study: 1) ROC AUC  $\geq$  0.930 (or ROC AUC  $\leq$  -0.930), 2) FC  $\geq$  1.50 (or FC  $\leq$  -1.50), and 3) P < 2.43 x 10<sup>-6</sup>. In fact, as can be seen, none of the 18 control genes met the individual significance criterion of any of the three different and independent methods employed.

**Table S3.** Results of the  $F_1$  function in the development phase

| Subject ID   | Subject No | $F_1$ Score | Notes |
|--------------|------------|-------------|-------|
| TCGA-CS-4938 | 1          | 20.6031     |       |
| TCGA-CS-5390 | 3          | 18.7324     |       |
| TCGA-CS-5394 | 4          | 19.0248     |       |
| TCGA-DB-5270 | 5          | 23.5807     |       |
| TCGA-DB-5273 | 6          | 20.0999     |       |
| TCGA-DB-5274 | 7          | 22.8516     |       |
| TCGA-DB-5276 | 9          | 22.2236     |       |
| TCGA-DB-5278 | 11         | 20.3211     |       |
| TCGA-DB-5280 | 13         | 16.4466     |       |
| TCGA-DB-5281 | 14         | 21.0244     |       |
| TCGA-DH-5141 | 16         | 23.1896     |       |
| TCGA-DU-6392 | 18         | 22.9112     |       |
| TCGA-DU-6393 | 19         | 24.0155     |       |
| TCGA-DU-6395 | 20         | 18.9559     |       |
| TCGA-DU-6396 | 21         | 16.3499     |       |
| TCGA-DU-6397 | 22         | 21.5289     |       |
| TCGA-DU-6399 | 23         | 19.3396     |       |
| TCGA-DU-6401 | 24         | 14.9465     |       |
| TCGA-DU-6407 | 26         | 17.0150     |       |
| TCGA-DU-6408 | 27         | 18.4863     |       |
| TCGA-DU-7007 | 28         | 23.4241     |       |
| TCGA-DU-7008 | 29         | 19.2650     |       |
| TCGA-DU-7011 | 31         | 20.0272     |       |
| TCGA-DU-7014 | 32         | 17.4065     |       |
| TCGA-DU-7015 | 33         | 18.8721     |       |
| TCGA-DU-7299 | 35         | 18.8136     |       |
| TCGA-DU-7302 | 36         | 20.3283     |       |
| TCGA-E1-5302 | 37         | 20.6246     |       |
| TCGA-E1-5303 | 38         | 21.7771     |       |
| TCGA-E1-5305 | 40         | 18.4177     |       |
| TCGA-E1-5307 | 41         | 18.1212     |       |
| TCGA-E1-5311 | 42         | 22.7442     |       |
| TCGA-E1-5319 | 44         | 21.1220     |       |
| TCGA-E1-5322 | 45         | 19.2545     |       |
| TCGA-HT-7480 | 46         | 18.1003     |       |
| TCGA-HT-7482 | 48         | 20.0125     |       |
| TCGA-HT-7483 | 49         | 18.8941     |       |
| TCGA-HT-7485 | 50         | 21.2371     |       |

|              |    |         |   |
|--------------|----|---------|---|
| TCGA-HT-7601 | 51 | 19.4745 |   |
| TCGA-HT-7602 | 52 | 21.4121 |   |
| TCGA-HT-7604 | 54 | 17.5262 |   |
| TCGA-HT-7605 | 55 | 22.1334 |   |
| TCGA-HT-7606 | 56 | 19.0777 |   |
| TCGA-HT-7609 | 58 | 17.3158 |   |
| TCGA-HT-7610 | 59 | 18.8204 |   |
| TCGA-HT-7676 | 61 | 17.5183 |   |
| TCGA-HT-7681 | 62 | 22.2633 |   |
| TCGA-HT-7684 | 63 | 22.6417 |   |
| TCGA-HT-7691 | 65 | 24.2259 |   |
| TCGA-HT-7693 | 66 | 17.9358 |   |
| TCGA-HT-7694 | 67 | 23.5650 |   |
| TCGA-HT-7856 | 69 | 24.0601 |   |
| TCGA-HT-7857 | 70 | 28.9318 | x |
| TCGA-HT-7858 | 71 | 17.0243 |   |
| TCGA-HT-7874 | 72 | 23.5586 |   |
| TCGA-HT-8013 | 74 | 18.1473 |   |
| TCGA-DU-5852 | 78 | 26.9029 |   |
| TCGA-DU-6402 | 80 | 37.8965 |   |
| TCGA-DU-6403 | 81 | 28.5118 |   |
| TCGA-DU-7012 | 83 | 31.4257 |   |
| TCGA-DU-7013 | 84 | 31.8338 |   |
| TCGA-DU-7290 | 85 | 35.6830 |   |
| TCGA-DU-7292 | 86 | 30.0601 |   |
| TCGA-DU-8158 | 87 | 31.0498 |   |
| TCGA-HT-7607 | 88 | 25.2198 |   |
| TCGA-HT-7616 | 89 | 27.9091 |   |

The  $F_1$  scores of the 66 subjects [56 LTS (# 1-75) and 10 STS (#76-89)] that were used for the development of the  $F_1$  function are shown. As can be seen, and based on the determined cut-off score for this phase (24.72), all of the 56 LTS subjects were classified correctly except one (# 70), and all of the 10 STS subjects were classified correctly. “x” denotes a misclassification.



**Table S4.** Results of the  $F_1$  function in the validation phase

| Subject ID   | Subject No | $F_1$ Score | Notes |
|--------------|------------|-------------|-------|
| TCGA-CS-4942 | 2          | 20.4138     |       |
| TCGA-DB-5275 | 8          | 19.5583     |       |
| TCGA-DB-5277 | 10         | 22.0500     |       |
| TCGA-DB-5279 | 12         | 24.4905     |       |
| TCGA-DB-A4XG | 15         | 18.2326     |       |
| TCGA-DU-5870 | 17         | 20.0020     |       |
| TCGA-DU-6404 | 25         | 29.0098     | x     |
| TCGA-DU-7009 | 30         | 18.4687     |       |
| TCGA-DU-7294 | 34         | 18.7784     |       |
| TCGA-E1-5304 | 39         | 20.6672     |       |
| TCGA-E1-5318 | 43         | 21.1144     |       |
| TCGA-HT-7481 | 47         | 20.3288     |       |
| TCGA-HT-7603 | 53         | 26.1538     | x     |
| TCGA-HT-7608 | 57         | 23.0015     |       |
| TCGA-HT-7620 | 60         | 20.1659     |       |
| TCGA-HT-7686 | 64         | 21.4548     |       |
| TCGA-HT-7855 | 68         | 14.5007     |       |
| TCGA-HT-7875 | 73         | 19.1403     |       |
| TCGA-HT-8113 | 75         | 25.1102     | x*    |
| TCGA-CS-4941 | 76         | 30.8289     |       |
| TCGA-CS-5397 | 77         | 28.7981     |       |
| TCGA-DU-6400 | 79         | 22.3210     | x     |
| TCGA-DU-7006 | 82         | 33.7616     |       |

The  $F_1$  scores of the 23 unknown subjects [19 LTS (# 1-75) and 4 STS (#76-89)] that were used for the validation of the  $F_1$  function are shown. As can be seen, and based on the original cut-off score that was determined in the development phase (24.72), all of the 19 LTS subjects were classified correctly except three (# 25, 53, & 75), and all of the 4 STS subjects were classified correctly except one (# 79). Using the more optimal cut-off score of 25.165, the unknown LTS subject # 75 (denoted by: x\*) is no longer misclassified by the  $F_1$ . “x” denotes a misclassification.

**Table S5.** Results of a 10-fold cross validation and a leave-one-out cross validation in connection with the performance of the  $F_1$  function

a) 10-fold cross validation:

K-fold cross validation partition

N: 89

Number of Test Sets: 10

Training Size: 81 80 80 80 80 80 80 80 80 80

Test Size: 8 9 9 9 9 9 9 9 9 9

Misclassification Rate = 0.05618

Mean-squared Error = 0.05618

Confusion Matrix:

|   |   |   |   |
|---|---|---|---|
| 6 | 0 | 1 | 1 |
| 8 | 0 | 0 | 1 |
| 7 | 0 | 1 | 1 |
| 8 | 0 | 0 | 1 |
| 8 | 1 | 0 | 0 |
| 8 | 0 | 0 | 1 |
| 7 | 0 | 0 | 2 |
| 7 | 0 | 0 | 2 |
| 6 | 1 | 1 | 1 |
| 7 | 0 | 0 | 2 |

-----  
-----

[72 2 3 12]

The Confusion Matrix to the left shows the cross validation results in each of the 10 folds (presented in the 10 rows of the matrix). The first column of the matrix shows the number of test subjects that were randomly selected from the first group (LTS) for validation purposes and were subsequently classified correctly. The second column shows the number of subjects that were randomly selected from the second group (STS) for validation purposes and were subsequently misclassified into the first group (LTS). The third column shows the number of subjects that were randomly selected from the first group (LTS) for validation purposes and were subsequently misclassified into the second group (STS). The fourth column shows the number of test subjects that were randomly selected from the second group (STS) for validation purposes and were subsequently classified correctly.

The row vector at the bottom is the summation matrix of the Confusion Matrix, i.e. its first element is the sum of all the values of the first column of the Confusion Matrix, its second element is the sum of all the values of the second column of the Confusion Matrix, etc. As can be seen from the summation matrix, following all ten folds of cross validation, of the 75 subjects of the first group (LTS), 72 were classified correctly and 3 were misclassified into the second group (STS); whereas of the 14 subjects of the second group (STS), 12 were classified correctly and 2 were misclassified into the first group (LTS).

In total, using a 10-fold cross validation, there were 5 misclassifications out of 89 subjects, and that yields a misclassification rate of 0.05618.

**b) Leave-one-out cross validation:**

Misclassification Rate = 0.05618

Mean-squared Error = 0.05618

Confusion Matrix:

|   |   |   |   |
|---|---|---|---|
| 1 | 0 | 0 | 0 |
| 1 | 0 | 0 | 0 |
| 0 | 0 | 0 | 1 |
| 1 | 0 | 0 | 0 |
| 1 | 0 | 0 | 0 |
| 0 | 0 | 1 | 0 |
| 0 | 0 | 0 | 1 |
| 1 | 0 | 0 | 0 |
| 1 | 0 | 0 | 0 |
| 1 | 0 | 0 | 0 |
| 1 | 0 | 0 | 0 |
| 0 | 0 | 0 | 1 |
| 1 | 0 | 0 | 0 |
| 0 | 1 | 0 | 0 |
| 1 | 0 | 0 | 0 |
| 1 | 0 | 0 | 0 |
| 1 | 0 | 0 | 0 |
| 1 | 0 | 0 | 0 |
| 1 | 0 | 0 | 0 |
| 1 | 0 | 0 | 0 |
| 1 | 0 | 0 | 0 |
| 1 | 0 | 0 | 0 |
| 1 | 0 | 0 | 0 |
| 1 | 0 | 0 | 0 |
| 1 | 0 | 0 | 0 |
| 1 | 0 | 0 | 0 |
| 1 | 0 | 0 | 0 |
| 1 | 0 | 0 | 0 |
| 1 | 0 | 0 | 0 |
| 1 | 0 | 0 | 0 |
| 1 | 0 | 0 | 0 |
| 0 | 0 | 0 | 1 |
| 0 | 1 | 0 | 0 |
| 1 | 0 | 0 | 0 |
| 1 | 0 | 0 | 0 |
| 1 | 0 | 0 | 0 |
| 1 | 0 | 0 | 0 |
| 0 | 0 | 0 | 1 |
| 0 | 0 | 0 | 1 |
| 1 | 0 | 0 | 0 |
| 0 | 0 | 1 | 0 |
| 1 | 0 | 0 | 0 |



|   |   |   |   |
|---|---|---|---|
| 1 | 0 | 0 | 0 |
| 1 | 0 | 0 | 0 |
| 1 | 0 | 0 | 0 |
| 0 | 0 | 0 | 1 |
| 1 | 0 | 0 | 0 |
|   |   |   |   |
|   |   |   |   |

[72 2 3 12]

The Confusion Matrix above shows the results of the leave-one-out cross validation. Since there are totally 89 subjects, there are 89 rounds of cross validation, and during each one of those, one subject is randomly left out and used for validation purposes. The first column shows the number of test subjects that were randomly left out from the first group (LTS) for validation purposes and were subsequently classified correctly. The second column shows the number of subjects that were randomly left out from the second group (STS) for validation purposes and were subsequently misclassified into the first group (LTS). The third column shows the number of subjects that were randomly left out from the first group (LTS) for validation purposes and were subsequently misclassified into the second group (STS). The fourth column shows the number of test subjects that were randomly left out from the second group (STS) for validation purposes and were subsequently classified correctly.

As can be seen from the summation matrix, at the bottom of the Confusion Matrix, following all 89 rounds of leave-one-out cross validation, of the 75 subjects of the first group (LTS), 72 were classified correctly and 3 were misclassified into the second group (STS); whereas of the 14 subjects of the second group (STS), 12 were classified correctly and 2 were misclassified into the first group (LTS).

In total, using a leave-one-out cross validation, there were 5 misclassifications out of 89 subjects, and that yields a misclassification rate of 0.05618.

**Table S6.** Supervised PCA results in connection with the 29 most significant genes

| Subject ID   | Subject No | PC1     | PC2     | Notes |
|--------------|------------|---------|---------|-------|
| TCGA-CS-4938 | 1          | -2.0216 | -0.2569 |       |
| TCGA-CS-4942 | 2          | -1.5569 | -0.3859 |       |
| TCGA-CS-5390 | 3          | -1.3292 | -0.3034 |       |
| TCGA-CS-5394 | 4          | -3.2032 | 0.7796  |       |
| TCGA-DB-5270 | 5          | 0.6549  | -1.5510 | x     |
| TCGA-DB-5273 | 6          | -2.4310 | 0.3817  |       |
| TCGA-DB-5274 | 7          | -0.0967 | -1.6334 |       |
| TCGA-DB-5275 | 8          | -2.0112 | 0.2033  |       |
| TCGA-DB-5276 | 9          | -0.5895 | -0.9637 |       |
| TCGA-DB-5277 | 10         | 0.3630  | -1.3536 | x     |
| TCGA-DB-5278 | 11         | -1.0077 | -0.1539 |       |
| TCGA-DB-5279 | 12         | -0.1544 | -1.4953 |       |
| TCGA-DB-5280 | 13         | -3.3818 | 1.2775  |       |
| TCGA-DB-5281 | 14         | -0.9242 | 0.3883  |       |
| TCGA-DB-A4XG | 15         | -2.1429 | 0.7690  |       |
| TCGA-DH-5141 | 16         | -2.3133 | -0.3032 |       |
| TCGA-DU-5870 | 17         | -1.8950 | 0.1495  |       |
| TCGA-DU-6392 | 18         | 3.6048  | 0.0206  | x     |
| TCGA-DU-6393 | 19         | -1.1865 | -1.2682 |       |
| TCGA-DU-6395 | 20         | -2.6774 | 0.0132  |       |
| TCGA-DU-6396 | 21         | -1.2391 | 0.8283  |       |
| TCGA-DU-6397 | 22         | -1.2834 | -0.6801 |       |
| TCGA-DU-6399 | 23         | -2.2162 | 0.1046  |       |
| TCGA-DU-6401 | 24         | -3.6034 | 1.0754  |       |
| TCGA-DU-6404 | 25         | 3.0144  | -0.8123 | x     |
| TCGA-DU-6407 | 26         | -2.9477 | 0.2656  |       |
| TCGA-DU-6408 | 27         | -3.3722 | 1.1508  |       |
| TCGA-DU-7007 | 28         | 1.1953  | -1.6702 | x     |
| TCGA-DU-7008 | 29         | -1.6269 | 0.0520  |       |
| TCGA-DU-7009 | 30         | -2.5524 | 0.8891  |       |
| TCGA-DU-7011 | 31         | -1.2557 | 0.8288  |       |
| TCGA-DU-7014 | 32         | -3.1395 | 1.8808  |       |
| TCGA-DU-7015 | 33         | -2.5806 | 0.7692  |       |
| TCGA-DU-7294 | 34         | -2.7889 | 0.8235  |       |
| TCGA-DU-7299 | 35         | -2.4063 | 0.3582  |       |
| TCGA-DU-7302 | 36         | -0.4170 | -0.3568 |       |
| TCGA-E1-5302 | 37         | -1.3578 | -0.1524 |       |
| TCGA-E1-5303 | 38         | -1.3774 | -0.9160 |       |

|              |    |         |         |   |
|--------------|----|---------|---------|---|
| TCGA-E1-5304 | 39 | -2.4572 | -0.3503 |   |
| TCGA-E1-5305 | 40 | -2.8153 | 0.6791  |   |
| TCGA-E1-5307 | 41 | -2.4712 | 0.3040  |   |
| TCGA-E1-5311 | 42 | -0.3180 | -1.3018 |   |
| TCGA-E1-5318 | 43 | -2.7072 | 0.3332  |   |
| TCGA-E1-5319 | 44 | -1.3902 | -0.6510 |   |
| TCGA-E1-5322 | 45 | -3.1368 | 1.1440  |   |
| TCGA-HT-7480 | 46 | -1.8090 | 0.7358  |   |
| TCGA-HT-7481 | 47 | -1.4217 | 0.1430  |   |
| TCGA-HT-7482 | 48 | -3.0045 | 0.8311  |   |
| TCGA-HT-7483 | 49 | -3.1403 | 2.2846  |   |
| TCGA-HT-7485 | 50 | -2.1111 | -0.3562 |   |
| TCGA-HT-7601 | 51 | -0.8142 | -0.1894 |   |
| TCGA-HT-7602 | 52 | -2.3967 | -0.0180 |   |
| TCGA-HT-7603 | 53 | -0.3573 | -0.3107 |   |
| TCGA-HT-7604 | 54 | -2.9863 | 1.1282  |   |
| TCGA-HT-7605 | 55 | -0.4961 | -0.6659 |   |
| TCGA-HT-7606 | 56 | -1.7123 | -0.5100 |   |
| TCGA-HT-7608 | 57 | -2.1408 | -0.5593 |   |
| TCGA-HT-7609 | 58 | -3.1335 | 1.1732  |   |
| TCGA-HT-7610 | 59 | -0.9535 | 0.2811  |   |
| TCGA-HT-7620 | 60 | -1.4036 | -0.4811 |   |
| TCGA-HT-7676 | 61 | -3.4217 | 1.2956  |   |
| TCGA-HT-7681 | 62 | -0.6528 | -0.4944 |   |
| TCGA-HT-7684 | 63 | -1.9025 | -1.0720 |   |
| TCGA-HT-7686 | 64 | -1.5654 | 0.3481  |   |
| TCGA-HT-7691 | 65 | 2.0365  | 1.9672  | x |
| TCGA-HT-7693 | 66 | -2.3374 | 0.5214  |   |
| TCGA-HT-7694 | 67 | 1.0140  | -1.3315 | x |
| TCGA-HT-7855 | 68 | -3.5669 | 1.7929  |   |
| TCGA-HT-7856 | 69 | 1.6708  | -1.5879 | x |
| TCGA-HT-7857 | 70 | 5.7183  | -0.4125 | x |
| TCGA-HT-7858 | 71 | -2.5942 | 1.1474  |   |
| TCGA-HT-7874 | 72 | 0.8565  | -1.0560 | x |
| TCGA-HT-7875 | 73 | -2.5013 | 0.7811  |   |
| TCGA-HT-8013 | 74 | -1.5152 | 0.2521  |   |
| TCGA-HT-8113 | 75 | 1.7669  | -1.6879 | x |
| TCGA-CS-4941 | 76 | 7.9784  | -0.4064 |   |
| TCGA-CS-5397 | 77 | 7.6077  | -1.0111 |   |
| TCGA-DU-5852 | 78 | 6.5219  | -1.5981 |   |
| TCGA-DU-6400 | 79 | 0.0951  | -1.3700 |   |
| TCGA-DU-6402 | 80 | 16.6182 | 7.1866  |   |
| TCGA-DU-6403 | 81 | 5.3630  | -0.6441 |   |

|              |    |         |         |  |
|--------------|----|---------|---------|--|
| TCGA-DU-7006 | 82 | 10.6607 | 2.4647  |  |
| TCGA-DU-7012 | 83 | 10.0215 | -0.2709 |  |
| TCGA-DU-7013 | 84 | 5.8626  | -1.9139 |  |
| TCGA-DU-7290 | 85 | 11.8734 | -2.5565 |  |
| TCGA-DU-7292 | 86 | 8.1825  | -1.9295 |  |
| TCGA-DU-8158 | 87 | 10.4996 | 1.6978  |  |
| TCGA-HT-7607 | 88 | 1.8597  | -1.5372 |  |
| TCGA-HT-7616 | 89 | 1.2813  | -0.9717 |  |

Results of the supervised PCA of all 89 subjects in connection with the 29 most significant genes. The scores of all 89 subjects according to the first two principal components (PC1 and PC2) are shown. According to the supervised PCA, if a subject has a PC1 score  $< 0$ , then that subject is classified as LTS subject; otherwise, if a subject has a PC1 score  $> 0$ , then that subject is classified as STS subject. As can be seen, the supervised PCA misclassified 11 subjects (# 5, 10, 18, 25, 28, 65, 67, 69, 70, 72, and 75) out of 89 subjects; that yields a misclassification rate of 0.12360. “x” denotes a misclassification.



**Table S7.** Overall results of the  $F_2$  function

| Subject ID   | Subject No | F <sub>1</sub> Score | Notes |
|--------------|------------|----------------------|-------|
| TCGA-CS-4938 | 1          | 20.6031              |       |
| TCGA-CS-4942 | 2          | 20.4138              |       |
| TCGA-CS-5390 | 3          | 18.7324              |       |
| TCGA-CS-5394 | 4          | 19.0248              |       |
| TCGA-DB-5270 | 5          | 23.5807              |       |
| TCGA-DB-5273 | 6          | 20.0999              |       |
| TCGA-DB-5274 | 7          | 22.8516              |       |
| TCGA-DB-5275 | 8          | 19.5583              |       |
| TCGA-DB-5276 | 9          | 22.2236              |       |
| TCGA-DB-5277 | 10         | 22.0500              |       |
| TCGA-DB-5278 | 11         | 20.3211              |       |
| TCGA-DB-5279 | 12         | 24.4905              |       |
| TCGA-DB-5280 | 13         | 16.4466              |       |
| TCGA-DB-5281 | 14         | 21.0244              |       |
| TCGA-DB-A4XG | 15         | 18.2326              |       |
| TCGA-DH-5141 | 16         | 23.1896              |       |
| TCGA-DU-5870 | 17         | 20.0020              |       |
| TCGA-DU-6392 | 18         | 22.9112              |       |
| TCGA-DU-6393 | 19         | 24.0155              |       |
| TCGA-DU-6395 | 20         | 18.9559              |       |
| TCGA-DU-6396 | 21         | 16.3499              |       |
| TCGA-DU-6397 | 22         | 21.5289              |       |
| TCGA-DU-6399 | 23         | 19.3396              |       |
| TCGA-DU-6401 | 24         | 14.9465              |       |
| TCGA-DU-6404 | 25         | 29.0098              | x     |
| TCGA-DU-6407 | 26         | 17.0150              |       |
| TCGA-DU-6408 | 27         | 18.4863              |       |
| TCGA-DU-7007 | 28         | 23.4241              |       |
| TCGA-DU-7008 | 29         | 19.2650              |       |
| TCGA-DU-7009 | 30         | 18.4687              |       |
| TCGA-DU-7011 | 31         | 20.0272              |       |
| TCGA-DU-7014 | 32         | 17.4065              |       |
| TCGA-DU-7015 | 33         | 18.8721              |       |
| TCGA-DU-7294 | 34         | 18.7784              |       |
| TCGA-DU-7299 | 35         | 18.8136              |       |
| TCGA-DU-7302 | 36         | 20.3283              |       |
| TCGA-E1-5302 | 37         | 20.6246              |       |
| TCGA-E1-5303 | 38         | 21.7771              |       |

|              |    |         |   |
|--------------|----|---------|---|
| TCGA-E1-5304 | 39 | 20.6672 |   |
| TCGA-E1-5305 | 40 | 18.4177 |   |
| TCGA-E1-5307 | 41 | 18.1212 |   |
| TCGA-E1-5311 | 42 | 22.7442 |   |
| TCGA-E1-5318 | 43 | 21.1144 |   |
| TCGA-E1-5319 | 44 | 21.1220 |   |
| TCGA-E1-5322 | 45 | 19.2545 |   |
| TCGA-HT-7480 | 46 | 18.1003 |   |
| TCGA-HT-7481 | 47 | 20.3288 |   |
| TCGA-HT-7482 | 48 | 20.0125 |   |
| TCGA-HT-7483 | 49 | 18.8941 |   |
| TCGA-HT-7485 | 50 | 21.2371 |   |
| TCGA-HT-7601 | 51 | 19.4745 |   |
| TCGA-HT-7602 | 52 | 21.4121 |   |
| TCGA-HT-7603 | 53 | 26.1538 | x |
| TCGA-HT-7604 | 54 | 17.5262 |   |
| TCGA-HT-7605 | 55 | 22.1334 |   |
| TCGA-HT-7606 | 56 | 19.0777 |   |
| TCGA-HT-7608 | 57 | 23.0015 |   |
| TCGA-HT-7609 | 58 | 17.3158 |   |
| TCGA-HT-7610 | 59 | 18.8204 |   |
| TCGA-HT-7620 | 60 | 20.1659 |   |
| TCGA-HT-7676 | 61 | 17.5183 |   |
| TCGA-HT-7681 | 62 | 22.2633 |   |
| TCGA-HT-7684 | 63 | 22.6417 |   |
| TCGA-HT-7686 | 64 | 21.4548 |   |
| TCGA-HT-7691 | 65 | 24.2259 |   |
| TCGA-HT-7693 | 66 | 17.9358 |   |
| TCGA-HT-7694 | 67 | 23.5650 |   |
| TCGA-HT-7855 | 68 | 14.5007 |   |
| TCGA-HT-7856 | 69 | 24.0601 |   |
| TCGA-HT-7857 | 70 | 28.9318 | x |
| TCGA-HT-7858 | 71 | 17.0243 |   |
| TCGA-HT-7874 | 72 | 23.5586 |   |
| TCGA-HT-7875 | 73 | 19.1403 |   |
| TCGA-HT-8013 | 74 | 18.1473 |   |
| TCGA-HT-8113 | 75 | 25.1102 |   |
| TCGA-CS-4941 | 76 | 30.8289 |   |
| TCGA-CS-5397 | 77 | 28.7981 |   |
| TCGA-DU-5852 | 78 | 26.9029 |   |
| TCGA-DU-6400 | 79 | 22.3210 | x |
| TCGA-DU-6402 | 80 | 37.8965 |   |
| TCGA-DU-6403 | 81 | 28.5118 |   |

|              |    |         |  |
|--------------|----|---------|--|
| TCGA-DU-7006 | 82 | 33.7616 |  |
| TCGA-DU-7012 | 83 | 31.4257 |  |
| TCGA-DU-7013 | 84 | 31.8338 |  |
| TCGA-DU-7290 | 85 | 35.6830 |  |
| TCGA-DU-7292 | 86 | 30.0601 |  |
| TCGA-DU-8158 | 87 | 31.0498 |  |
| TCGA-HT-7607 | 88 | 25.2198 |  |
| TCGA-HT-7616 | 89 | 27.9091 |  |

The  $F_1$  scores of all 89 subjects [75 LTS (# 1-75) and 14 STS (# 76-89)] are listed. Those results of the overall performance of the  $F_1$  function were obtained by combining the results from the development phase (listed in **Table S3**) with those from the validation phase (listed in **Table S4**). Using the final cut-off score of 25.165, if a subject has an  $F_1$  score  $< 25.165$ , then that subject is classified as LTS; otherwise, if a subject has an  $F_1$  score  $\geq 25.165$ , then that subject is classified as STS. As can be seen, all of the 75 LTS subjects were classified correctly except three (# 25, 53, & 70), and all of the 14 STS subjects were classified correctly except one (# 79). “x” denotes a misclassification.
